# Supplementary material for: Uptake and Immunomodulatory Properties of Betanin, Vulgaxanthin I and Indicaxanthin towards Caco-2 Intestinal Cells
Source: MDPI journal article supplement (doi:10.3390/antiox11081627), 2022-08-22
Supplement: s1 [file s1]

## Supplementary materials

Table S1. Human primer sequence information.

| Markers        | Forward sequence                | Reverse sequence                | Sequence ID    |
|----------------|---------------------------------|---------------------------------|----------------|
| $\beta$ -actin | 5'- AGAGCTACGAGCTGCCTGAC -3'    | 5'- AGCACTGTGTTGGCGTACAG -3'    | NM_001101.5    |
| IL-6           | 5'- CGGCCACTCACCTCTTCAGAA-3'    | 5'- GGCAAGTCTCCTCATTGAATCC-3'   | NM_001371096.1 |
| IL-8           | 5'- TGGAGAAGTTTTTGAAGAGGGCT -3' | 5'- CAACAGACCCACACAATACATGA -3' | NM_000584.4    |
| COX-2          | 5'- ATTGACCAGAGCAGGCAGAT -3'    | 5'- CTCCACAGCATCGATGTCAC -3'    | NM_000963.4    |
| iNOS           | 5'- ACAGCACATTCAGATCCCCA -3'    | 5'- GCCGAGATTTGAGCCTCATG -3'    | NM_000625.4    |
| NOX-1          | 5'- GTCTCTTCCTCACCGGATGG -3'    | 5'- CCCACTACAGACTTGGGGTG -3'    | NM_001271815.2 |
| NQO-1          | 5'- AGAAAGGATGGGAGGTGGTG -3'    | 5'- ATATCACAAGGTCTGCGGCT -3'    | NM_000903.3    |
| HO-1           | 5'- CTTCTTCACCTTCCCCAACA -3'    | 5'- AGCTCCTGCAACTCCTCAAA -3'    | NM_002133.3    |
| GCLC           | 5'- CAATGGGAAGGAAGGTGTGT -3'    | 5'- GCGATAAACTCCCTCATCCA -3'    | NM_001498.4    |
| GPX-1          | 5'- CCGGGACTACACCCAGATGA -3'    | 5'- CTTGGCGTTCTCCTGATGCC -3'    | NM_000581.4    |
| GSTA-1         | 5'- CTTCTGCCCCGTATGTCCACC -3'   | 5'- ACCAGATGAATGTCAGCCCG -3'    | NM_001319059.2 |
| GSTP-1         | 5'- GCGGGCAAGGATGACTATGT -3'    | 5'- GTCAGCGAAGGAGATCTGGTC -3'   | NM_000852.4    |

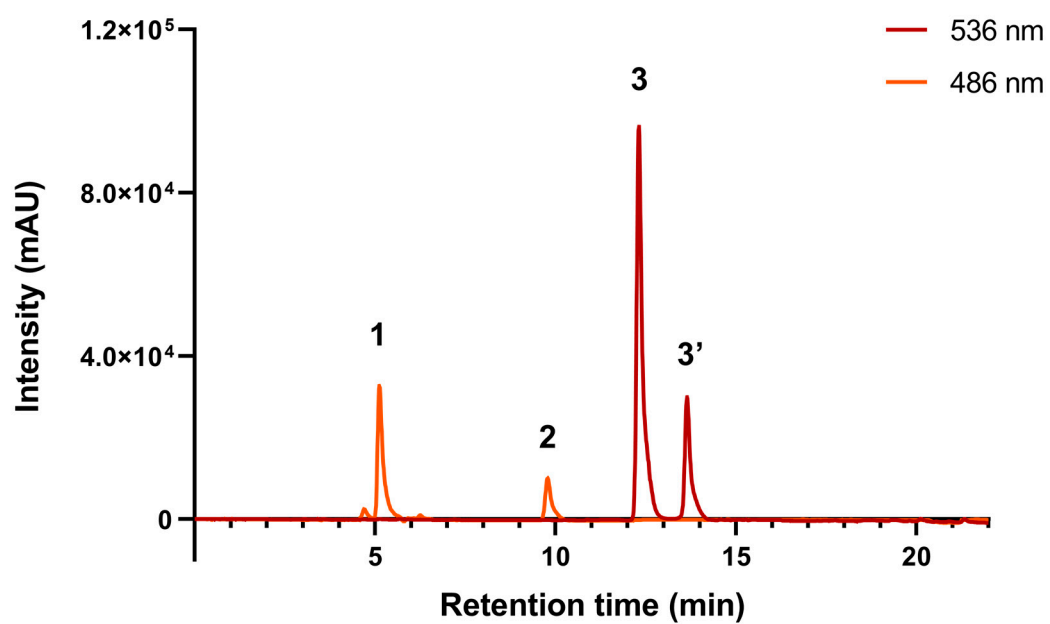

Figure S1. Spectrophotometric Chromatogram of purified betalain standards at the detection wavelengths of 536 nm and 486 nm. Individual peaks refer to vulgaxanthin I (1), indicaxanthin (2), betanin (3) and isobetanin (3').

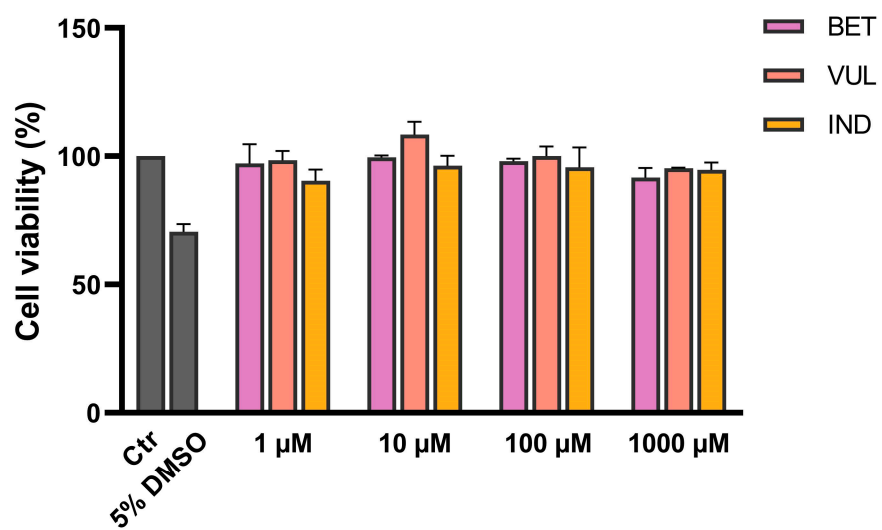

Figure S2. Viability of Caco-2 cells (%) using MTT assay after treatment with increasing concentrations of individual betalains. Data are presented as mean with SEM of triplicates from independent cell passag
